# Supplementary material
Source: Springer Nature journal article supplement (https://www.springermedizin.de/resource/supplementary/12955_2005_239_MOESM2_ESM.pdf/9560058)

Effect Size

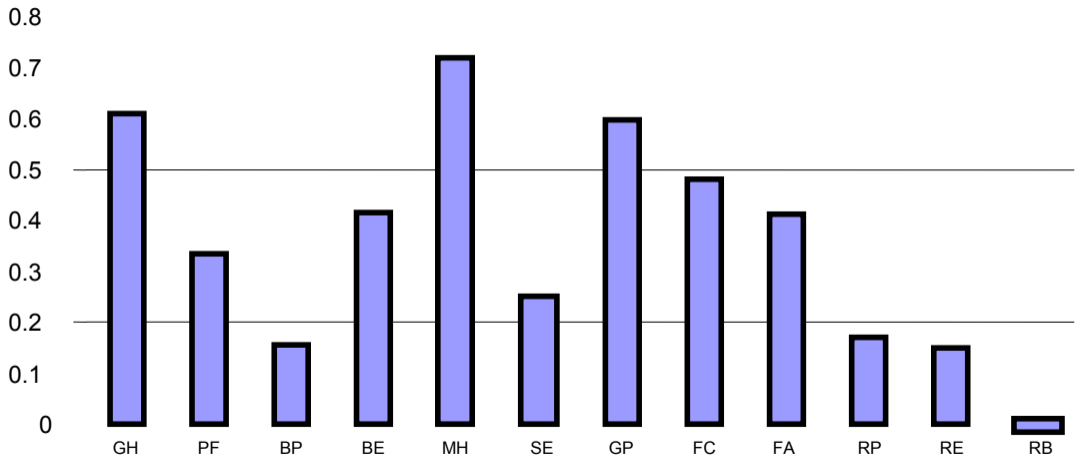

Supplement: MOESM2 [file 9560058]
